# Who Gets Measles in Europe?

**Mark Muscat**

Department of Epidemiology, Statens Serum Institut, Copenhagen, Denmark

**Background.** Measles outbreaks continue to occur in Europe as a result of suboptimum vaccination coverage. This article aims to describe individuals susceptible to measles, and provide an overview of affected groups and the public settings in which measles transmission occurred in Europe in 2005–2009.

**Methods.** Individuals susceptible to measles were described and categorized on the basis of factors leading to nonvaccination and vaccine failure. A literature search was conducted to identify affected groups and public settings in which measles transmission occurred.

**Results.** Most individuals susceptible to measles are previously uninfected and unvaccinated. The reasons for nonvaccination in individuals eligible for vaccination ranged from lack of information to poor access to health care. Several outbreaks have emerged in Roma and Sinti, Traveller, anthroposophic, and ultra-orthodox Jewish communities, and immigrants identifying them as being particularly at risk. Public settings for transmission included mostly educational and health care facilities.

**Conclusions.** Improved efforts are needed to strengthen immunization programs, identify barriers for measles-containing vaccine uptake, and explore methods to target vulnerable populations that are not being reached with routine immunization delivery services. Specific measures are needed to prevent and control measles in educational and health care facilities. Failure to identify who gets measles and implement the elimination strategies raises concerns for the successful and sustainable elimination of measles in Europe.

Measles outbreaks continue to occur in Europe, underscoring some of the challenges still to be addressed in relation to the goal of eliminating measles from the region [1]. During 2005–2009, several countries reported outbreaks affecting the general population; other outbreaks predominantly involved particular groups. The World Health Organization's strategy for measles elimination in the European region stipulates that vaccination programs should achieve and sustain a minimum of 95% coverage with 2 doses of a measles-containing vaccine (MCV) [1]. Suboptimum vaccination coverage in many countries resulted in unvaccinated individuals comprising the majority of

measles cases in Europe [2]. Therefore, it is fundamental to identify and target susceptible individuals for vaccination. Moreover, increased awareness of settings where measles outbreaks occur will help envisage potential future outbreaks and, therefore, allow prompt and more effective implementation of preventative and control measures. This article aims to describe individuals susceptible to measles and to provide an overview of affected groups and the public settings in which measles transmission occurred in Europe during 2005–2009.

## METHODS

With the use of examples from situations in European countries, individuals susceptible to measles were described and categorized on the basis of factors leading to nonvaccination and vaccine failure. To describe particular groups affected by outbreaks and public settings in which measles transmission occurred, a literature search was conducted using the PubMed database. An outbreak was defined as at least 2 epidemiologically linked measles cases. Europe was defined as the current 27 European Union member states (Austria, Belgium, Bulgaria, Cyprus,

Potential conflicts of interest: none reported.

Supplement sponsorship: This article is part of a supplement entitled "Global Progress Toward Measles Eradication and Prevention of Rubella and Congenital Rubella Syndrome," which was sponsored by the Centers for Disease Control and Prevention.

Correspondence: Mark Muscat, MD, Dept of Epidemiology, Statens Serum Institut, Artillerivej 5, DK-2300 Copenhagen S, Denmark. (markmuscat1@gmail.com).

**The Journal of Infectious Diseases** 2011;204:S353–S365

© The Author 2011. Published by Oxford University Press on behalf of the Infectious Diseases Society of America. All rights reserved. For Permissions, please e-mail: journals.permissions@oup.com

0022-1899 (print)/1537-6613 (online)/2011/204S1-0045\$14.00

DOI: 10.1093/infdis/jir067

Czech Republic, Denmark, Estonia, France, Finland, Germany, Greece, Hungary, Ireland, Italy, Latvia, Lithuania, Luxembourg, Malta, the Netherlands, Portugal, Poland, Romania, Slovakia, Slovenia, Spain, Sweden, and the United Kingdom), 15 immediate geographically- and culturally-related nearby countries or territories, namely Albania, Belarus, Bosnia and Herzegovina, Croatia, Gibraltar, Iceland, Macedonia (FYRM), Monaco, Moldova, Norway, Russia, Serbia, Switzerland, Turkey and Ukraine, and Israel. The titles of journal articles in English published from 1 January 2005 through 1 May 2010, including the terms “measles” in combination with “Europe” and “European” and the names of the individual countries in Europe and “measles outbreak” and “measles outbreaks” were searched. The search term used for the United Kingdom also included the names of its constituent countries, namely England, Wales, Scotland, and Northern Ireland. The search yielded 190 articles. These were screened to identify particular groups affected by measles outbreaks and the public settings where measles transmission occurred in the 5-year period from 2005 through 2009. Settings outside the household environment were identified. When >1 publication described the same outbreak, the more recent publication was used. A total of 39 articles were selected. The identified affected groups and settings were categorized accordingly, and results were tabulated. The literature on the particular groups affected by measles was also searched to provide the reader with background knowledge on these groups and facts relevant to the subject discussed.

## RESULTS

### Susceptible Individuals

Immunity is believed to be lifelong after natural infection with measles virus or following a dose of live measles vaccine that is properly administered to an appropriate host and that results in seroconversion [3, 4]. Therefore, individuals who have not been affected by measles and are unvaccinated are susceptible to the disease. In 2007, 3,104 (87%) measles cases in Europe were unvaccinated [2]. Depending on their eligibility to be vaccinated unvaccinated individuals broadly fall into 1 of 2 groups. Of the ineligible group, most are of an inappropriate age for vaccination, according to national immunization programs. A small fraction would, however, be ineligible because they have contraindications to the vaccine. The second group consists of individuals who are eligible for vaccination but are not vaccinated. On the other hand, some individuals are still susceptible, because although having been vaccinated, the vaccine fails to produce an immune response.

### Susceptibility Due to Nonvaccination

#### Ineligible individuals

*Inappropriate age.* In most European countries' national vaccination programs, the measles vaccine is given in combination with mumps and rubella vaccine (MMR) and is administered as

a 2-dose schedule. As the first dose is usually recommended at 12–15 months of age [5], persons younger than this age are ineligible for vaccination. Infants are usually protected by maternally-derived antibodies only during their first months of life [3] after which they become susceptible to measles. Indeed, during 2006 and 2007, the highest age-specific measles incidence was observed in infants <1 year of age [2]. This also reflected the intensity of the transmission of measles. Individuals younger than the recommended age for the second MCV dose are ineligible for complete vaccination and, having received only 1 dose, could still be susceptible to measles. Most countries recommend the second dose by 6 years of age [5]. In 2007, 137 (17%) persons with measles who were aged 1–4 years had been vaccinated with a single dose. However, an undetermined proportion of these would not have been eligible, because they were too young to be vaccinated.

Some adults are also susceptible because they have not been affected by measles and were too old to be vaccinated when the 2-dose measles immunization schedules were introduced during the 1980s. In 2007, 724 (19%) persons with measles in Europe were aged  $\geq 20$  years [2]. However, this proportion would also include individuals, particularly those in their early twenties who would have been targeted at the start of the vaccination campaigns but missed the opportunity for vaccination. *Contraindications for MCV vaccination.* Individuals with a serious allergy to any of the ingredients or constituents of vaccines containing a measles component would be ineligible for vaccination. In addition, because the measles component is live-attenuated, MCVs are contraindicated in acute severe illness and severe immunodeficiency [3] resulting from conditions, such as malignancy and its treatment, AIDS, prolonged high-dose steroid treatment, and certain rare inherited primary immunodeficiency disorders. Patients with such conditions resulting in deficiencies of cell-mediated immunity and with measles have a severe and often fatal course [6]. Two measles-related deaths reported in Europe during 2006–2007 occurred among immunocompromised patients; one had a genetic immunodeficiency disorder, and the other was receiving immunosuppressive therapy for an underlying lung condition [7, 8].

#### Eligible individuals

In 2007, of those persons with measles in Europe who were aged 15–19 years, 358 (85%) were unvaccinated and 42 (10%) had received a single dose [2]. According to national immunization programs, they should have received 2 MCV doses. The risk factors for nonvaccination or delayed vaccination are complex and diverse and range from personal knowledge of vaccines to access to health care.

*Lack of information, misinformation, and beliefs.* Individuals may be unvaccinated because their parents were not adequately informed about measles vaccination and its benefits or were concerned about its safety [9, 10]. In the United Kingdom, many

parents and some health care professionals were uncertain about whether to have children vaccinated after considerable media coverage of a research article published in 1998 that suggested a link between the MMR vaccine and the development of gastrointestinal disease and autism. The research was discredited, and the article was eventually retracted from published record 12 years later [11]. However, this controversy resulted in the proportion of children in the United Kingdom who received their first vaccine dose by 2 years of age decreasing from a high of 92.5% during April–June 1995 [12] to a low of 78.9% during the same period in 2003 [13]. During 2006 and 2007, the level of reported measles cases placed the United Kingdom in the high incidence category ( $>1$  case per 100,000 inhabitants) for measles [2]. In Germany, parents objected to vaccination because they thought that the child benefited from the illness itself [14], and family doctors were reported to withhold advice or even advise against measles vaccination [15]. During 2006 and 2007, Germany was in the moderate to high incidence category for measles (0.1–1 and  $>1$  case per 100,000 inhabitants, respectively) [2]. The outbreak in Belgium during 2007–2008 among members of the ultra-orthodox Jewish community mostly involved individuals eligible for vaccination who were unvaccinated patients of the same general practitioner known to oppose vaccination [16]. Other persons in this outbreak, however, were not vaccinated because of fear of adverse effects, allergy, or frequent disease during childhood. None of the families mentioned religious beliefs as a reason for nonvaccination.

Parental perception of the diseases that are preventable by vaccines can also influence their decision to have their children vaccinated or not. Apart from the MMR vaccine being least likely to be considered safe, measles was often not regarded as a serious disease [10, 17]. Such poor personal knowledge results in doubt, skepticism, and opposition toward vaccination and empowers anti-vaccination activists. Anti-vaccination groups have been known to exist for  $>200$  years, disrupting the use of many vaccines in various countries [18]. Vaccine opponents usually have their attitudes rooted in health concerns and philosophical, and religious beliefs and often are part of communities whose members share the same attitudes toward vaccines.

Incorrect information on the contraindications to MCV also has negative consequences. In the Ukraine outbreak during 2005–2006, the older age profile of the cases suggested a lack of previous vaccination because of the extensive number of contraindications accepted in the former Soviet Union [19]. In Italy, a country that has repeatedly experienced large outbreaks [7, 20], both parents and pediatricians were reported to give disproportionate importance to mild intercurrent diseases as a reason to defer vaccination [21].

*Poor access to health care.* Outbreaks have often occurred in minority ethnic groups and immigrants. A variety of factors can

act as barriers for members of such groups to avail themselves for vaccination. These factors include: cultural, language, ethnicity, racial discrimination, and socioeconomic. Collectively, individuals sharing such risk factors have been identified as being part of vulnerable populations with low vaccination coverage. These are described in more detail below.

### **Susceptibility Due to Vaccine Failure**

Two percent to 5% of vaccinated children who receive only 1 dose of age-appropriate MCV fail to develop immunity to measles (primary vaccine failure) [3, 22]. Nevertheless, non-response to the first dose is generally overcome by the administration of a second dose [23], inducing the same high rate of immune response that follows initial vaccination [3]. Failure to induce immune response may also be the result of administering MCV at too young an age [24], because of the presence of maternally-derived antibodies that may neutralize the vaccine virus. Other potential causes of primary vaccine failure include poor quality vaccines and their improper storage. Possible reasons contributing to the outbreak in the Ukraine during 2005–2006 included poor quality control during vaccine production and a break in the cold chain [19]. Waning of vaccine-induced immunity does not appear to play a major role in reducing overall population immunity to measles [25], and case reports of measles occurrence in individuals with a previously documented seroconversion after MCV vaccination (secondary vaccine failure) are rare [26, 27].

### **Affected Groups and Settings for Transmission**

During the period 2005–2009, several measles outbreaks in Europe were documented among Roma and Sinti communities, Traveller communities, anthroposophic groups, ultra-orthodox Jewish communities, and immigrants identifying them as being particularly at risk (Table 1). Most cases were unvaccinated or vaccinated with only 1 MCV dose. Background information on the particular groups affected by measles in Europe is given in the appendix.

Unvaccinated international travelers to countries where measles is still endemic or where outbreaks are ongoing have also been identified as a risk group. The importance of recognizing this heterogeneous group lies in its increased risk of acquiring measles as much as in its ability to spread the disease across borders. In 2007, 84 (4%) cases with a known importation status in Europe were considered as imported [2]. Measles virus importation has resulted in several outbreaks among the general population [7, 28, 29], and particular groups [16, 30–37], in schools [36, 38], and in health care settings [39–43].

Many outbreaks consisted of a series of transmission chains in families and household contacts [7, 44–47]. However, several others had their foci in school settings. Schools and daycare centers embracing philosophies and religious beliefs that oppose vaccination were particularly affected. These included anthroposophic schools, also known as Steiner or Waldorf schools,

**Table 1. Measles Outbreaks Among Particular Groups**

| Period    | Country     | Groups affected <sup>a</sup>    | Comments                                                                                                                                                                                                                                                                                                                             | References |
|-----------|-------------|---------------------------------|--------------------------------------------------------------------------------------------------------------------------------------------------------------------------------------------------------------------------------------------------------------------------------------------------------------------------------------|------------|
| 2004–2007 | Romania     | Roma                            | The outbreak that involved >8,000 cases, started among unvaccinated members of Roma and Sinti communities and spread to the general population.                                                                                                                                                                                      | [67]       |
| 2005      | Portugal    | Romanian community              | An imported measles case from Romania resulted in an outbreak affecting 6 children in two Romanian communities living in Portugal.                                                                                                                                                                                                   | [32]       |
| 2005–2006 | Greece      | Roma and immigrants             | Out of 171 reported cases, 94 (55%) belonged to Roma families, mostly unvaccinated preschool age children. The outbreak also involved 25 (15%) immigrants who were unvaccinated and incompletely vaccinated.                                                                                                                         | [68]       |
| 2006      | Italy       | Roma and Sinti                  | An outbreak of 17 cases in the Autonomous Province of Bolzano-South Tyrol involved 13 Roma/Sinti. Another outbreak of nine cases among Roma/Sinti occurred on the island of Sardinia and included 4 children who had returned from Rome after attending a funeral there. None of the Roma/Sinti had been vaccinated against measles. | [69]       |
| 2006      | Italy       | Roma and Sinti                  | An outbreak involving 98 cases was reported in the Roma/Sinti community in 19 settlements in Rome. At the same time a total of 204 cases were reported in the general population.                                                                                                                                                    | [70]       |
| 2006      | Spain       | Travellers and Roma             | The first 2 cases belonged to a Traveller community living mainly in the UK. In addition, the outbreak involved Roma (9 cases) and the general population.                                                                                                                                                                           | [34]       |
| 2007      | Serbia      | Roma                            | Out of 78 confirmed cases, 77 were in Roma.                                                                                                                                                                                                                                                                                          | [71]       |
| 2007      | Belgium     | Ultra-orthodox Jewish community | The outbreak involved at least 137 cases of whom 129 cases (94%) were members of the ultra-orthodox Jewish community living in Antwerp, Belgium. The first two cases were children of the same community who had returned from a summer camp in the UK.                                                                              | [16]       |
| 2007      | UK          | Irish Traveller community       | The outbreak involved 173 cases of which 156 were in Travellers. Early in the course of the outbreak, 21 confirmed cases were reported among Travellers who attended a funeral in London, England.                                                                                                                                   | [72]       |
| 2007      | Norway      | Irish Travellers                | Fifteen cases were reported in Travellers from England at a camping site in Norway. The index case was reported to have been in contact with a measles case in England.                                                                                                                                                              | [33]       |
| 2007–2008 | Italy       | Roma/Sinti                      | The outbreak that started in the region of Piemonte spread to other regions. Transmission occurred in the general population, in families, schools, hospitals, anti-vaccination groups and in Roma/Sinti. Importation from the UK was reported.                                                                                      | [7]        |
| 2007      | Israel      | Ultra-orthodox Jewish community | The outbreak involved 491 cases almost exclusively in the same ultra-orthodox Jewish community in Jerusalem. The outbreak was linked to members of the same community living in London, England. Infants had the highest age-specific incidence.                                                                                     | [35]       |
| 2008      | Austria     | Anthroposophic community        | Of the 394 outbreak cases, 123 were in students attending anthroposophic educational facilities in Salzburg. The outbreak spread to other members of the anthroposophic community and the general population.                                                                                                                        | [36]       |
| 2008      | Netherlands | Anthroposophic community        | The outbreak primarily involved students in two anthroposophic schools. It extended to involve the family members of the students.                                                                                                                                                                                                   | [73]       |
| 2008      | Croatia     | Roma                            | The outbreak involved a Roma community and the general population. Importation from Italy was reported.                                                                                                                                                                                                                              | [37]       |
| 2009      | Bulgaria    | Roma                            | The outbreak emerged after seven years without indigenous transmission. The index case was reported to be imported from Germany. By the end of week 48 of 2009, 957 measles cases had been recorded, of which at least 90% were in Roma.                                                                                             | [30]       |
| 2009      | Austria     | Anthroposophic community        | An outbreak involving 37 cases spread from the general population (12 cases) to an anthroposophic community (25 cases).                                                                                                                                                                                                              | [74]       |
| 2009      | Poland      | Roma                            | Among 41 cases reported in an outbreak in Pulawy, 35 in Roma. Importation from England was described.                                                                                                                                                                                                                                | [31]       |
| 2009–2010 | Ireland     | Traveller and Roma communities  | The outbreak involved Travellers, Roma and the general population.                                                                                                                                                                                                                                                                   | [75]       |

**NOTE.** <sup>a</sup> Named as quoted from the references.

**Table 2. Settings for Measles Transmission in Europe**

| Period                                     | Country     | City/Region                | Comments                                                                                                                                                                                                                                                          | Reference |
|--------------------------------------------|-------------|----------------------------|-------------------------------------------------------------------------------------------------------------------------------------------------------------------------------------------------------------------------------------------------------------------|-----------|
| <b>Schools and daycare centres</b>         |             |                            |                                                                                                                                                                                                                                                                   |           |
| 2005                                       | Germany     | Bavaria                    | Most cases were related to schools and preschool facilities: 45 attended a primary school in Munich; 52 attended the same Montessori school; 42 attended in four kindergartens and 38 were in four other schools.                                                 | [45]      |
| 2005–06                                    | Spain       | La Rioja                   | The outbreak involved two daycare centers as part of larger outbreak of 18 confirmed cases.                                                                                                                                                                       | [76]      |
| 2006                                       | Germany     | Duisburg                   | During the outbreak in Duisburg, the largest two clusters occurred at secondary schools and involved 55 and 33 cases.                                                                                                                                             | [77]      |
| 2006                                       | Italy       | Lazio                      | A cluster of 6 cases occurred among adolescents and young adults attending a professional school in the outskirts of Rome.                                                                                                                                        | [70]      |
| 2006–07                                    | Spain       | Catalonia                  | Preschool and daycare facilities were identified as sources of infection in 68 cases.                                                                                                                                                                             | [44]      |
| 2006–07                                    | Italy       | Puglia                     | Of the 18 cases reported in this outbreak, 8 were in unvaccinated students attending the same school.                                                                                                                                                             | [78]      |
| 2006–07                                    | Switzerland | Countrywide                | The outbreak involved schools, an anthroposophic boarding school and daycare centers.                                                                                                                                                                             | [47]      |
| 2007                                       | Germany     | Bavaria                    | The initial outbreak in Montessori school affecting 26 students spread to other schools and a kindergarten. A total of 90 cases were reported in the districts of Passau and Rottal-Inn in Lower Bavaria.                                                         | [79]      |
| 2007                                       | Germany     | Bavaria                    | A cluster was reported in a Montessori kindergarten in which 12 children became ill with measles.                                                                                                                                                                 | [80]      |
| 2007–08                                    | Italy       | Countrywide                | The outbreak started in the region of Piemonte spreading to other regions. Various settings identified including schools.                                                                                                                                         | [7]       |
| 2008                                       | Austria     | Salzburg                   | The outbreak involved 123 pupils attending an anthroposophic school (116 cases) and a kindergarten (7 cases). It extended to the neighboring German federal state of Bavaria through cases in German pupils attending the same anthroposophic school in Salzburg. | [36]      |
| 2008                                       | France      | Burgundy and other regions | A total of 110 cases were identified among elementary and secondary students of 2 private religious schools and their siblings. The outbreak extended to the general community and also involved other private and public schools.                                | [81]      |
| 2008                                       | Germany     | Baden-Württemberg          | Nineteen measles cases were identified in children, adolescents and young adults attending a school in the county of Lörrach.                                                                                                                                     | [82]      |
| 2008                                       | UK          | London                     | Outbreaks were reported in 2 schools with 9 confirmed and 29 probable cases.                                                                                                                                                                                      | [83]      |
| 2009                                       | Austria     | Styria                     | The outbreak involved 12 pupils of an anthroposophic school.                                                                                                                                                                                                      | [74]      |
| 2009                                       | Switzerland | Lausanne                   | An outbreak was identified mainly affecting students from the Ecole Polytechnique Fédérale and the University of Lausanne following an importation of measles from Mali.                                                                                          | [38]      |
| <b>Hospital and health care facilities</b> |             |                            |                                                                                                                                                                                                                                                                   |           |
| 2005–06                                    | Greece      | Unspecified                | The outbreak consisted of two hospital clusters with 4 cases each.                                                                                                                                                                                                | [68]      |
| 2005–06                                    | Spain       | La Rioja                   | The outbreak involved patient-to-doctor and doctor-to-patient transmission as part of larger outbreak of 18 confirmed cases.                                                                                                                                      | [76]      |
| 2006                                       | Italy       | Grosseto                   | Twelve patients including 8 health care workers were reported to have acquired measles through nosocomial transmission. The index case returned from India.                                                                                                       | [39]      |
| 2006                                       | Italy       | Lazio                      | Nosocomial transmission was reported as part of larger outbreak involving a total of 161 cases.                                                                                                                                                                   | [69]      |
| 2006                                       | Spain       | Madrid                     | Nine cases were reported to occur in health care staff.                                                                                                                                                                                                           | [34]      |
| 2006–07                                    | Spain       | Catalonia                  | Health care centers were identified as sources of infection in 37 cases.                                                                                                                                                                                          | [44]      |

**Table 2.** (Continued)

| Period                | Country           | City/Region            | Comments                                                                                                                                                                                                                                                                                    | Reference |
|-----------------------|-------------------|------------------------|---------------------------------------------------------------------------------------------------------------------------------------------------------------------------------------------------------------------------------------------------------------------------------------------|-----------|
| 2007                  | Netherlands       | Amsterdam              | Two health care workers and a medical student were affected by measles after contact with the index case in hospital.                                                                                                                                                                       | [84]      |
| 2007                  | France            | Unspecified            | A small cluster occurred after the index case returned from Thailand infecting his doctor who subsequently infected his wife.                                                                                                                                                               | [40]      |
| 2007                  | Switzerland       | Geneva                 | Transmission was reported to occur in a hospital waiting room in 1 case belonging to a small cluster of 11 cases.                                                                                                                                                                           | [46]      |
| 2007–08               | Italy             | Countrywide            | The outbreak that started in the region of Piemonte spread to other regions. Various settings were identified including hospitals.                                                                                                                                                          | [7]       |
| 2008                  | Sweden            | Gothenburg             | The outbreak that involved 2 visitors in the emergency department. The index case returned from France.                                                                                                                                                                                     | [41]      |
| 2008                  | Italy             | Apulia                 | Of the 8 cases that were related to a nosocomial outbreak, 5 had been inpatients in the same infectious disease ward.                                                                                                                                                                       | [85]      |
| 2008                  | UK                | London                 | Nine cases were linked to a child admitted to a pediatric ward.                                                                                                                                                                                                                             | [83]      |
| 2008                  | Denmark           | Copenhagen             | Two cases were believed to have acquired measles at the waiting room of the general practitioner and another one at the hospital in which the index case was admitted. The index case returned from Nepal and India.                                                                        | [43]      |
| 2008                  | France and Monaco | Reims, Nice and Monaco | An outbreak in Reims involved three health care staff. Patient-to-staff transmission was documented. The two nosocomial clusters in Nice and Monaco involved 17 cases. Patient-to-staff and patient-to-patient transmission was reported.                                                   | [40]      |
| 2008–09               | Denmark           | Copenhagen             | A cluster of six confirmed cases of measles occurred among children admitted to the pediatric department of a hospital. The index case returned from East Africa.                                                                                                                           | [42]      |
| <b>Other settings</b> |                   |                        |                                                                                                                                                                                                                                                                                             |           |
| 2006–07               | Switzerland       | Countrywide            | A large variety of different settings for transmission were identified including ski camps, sport clubs, a military accommodation facility, a cinema, airplanes, an airport, and so-called “measles parties” organized with the aim of voluntarily exposing children to an infected person. | [47]      |
| 2007                  | Germany           | Southern Bavaria       | One cluster of five cases was linked to a restaurant in which an employee fell ill.                                                                                                                                                                                                         | [80]      |
| 2009                  | Austria           | Styria                 | A billiard pub was implicated as a site of measles transmission.                                                                                                                                                                                                                            | [74]      |

and traditionalist religious schools. Hospitals and other health care facilities have also been foci for outbreaks, with transmission occurring between patients, from patients to hospital staff, and from hospital staff to patients. Table 2 shows the identified public settings where measles transmission occurred.

## DISCUSSION

Improved efforts are needed to identify barriers to vaccine acceptance and to explore methods to target susceptible individuals and vulnerable groups that are not being reached with standard immunization programs. Strengthening immunization

programs requires a steady commitment by governments, health authorities, and decision makers, including immunization program managers. The availability of good-quality vaccines, maintenance of the cold chain, and easy access to vaccination are essential components of immunization programs. Reminders and recall systems have been shown to be effective for improving vaccination rates [48] and, together with accurate monitoring of vaccination coverage, should be incorporated into the implementation of immunization programs. Routine supervision of immunization programs should also have the ability to identify factors for suboptimum vaccination coverage, such as recent migration, large family size, and poor socioeconomic status [49]. Such factors should serve as alert signals to recognize families

and groups needing support for their children to be fully vaccinated. Identifying other reasons may require special studies, particularly to discover any special characteristics, changing attitudes, and awareness toward vaccination.

Adults without a history of vaccination against measles or of the illness may lack the motivation to be vaccinated. Therefore, issuing policies to do so may be unsuccessful. However, MMR vaccination should be strongly recommended to persons intending to travel to areas where measles is endemic and where outbreaks are reported. Susceptible travelers can also be infected at international airports where passengers from all across the world converge [50]. Several countries have well-established recommendations on pretravel measles vaccination [51–53]. Such recommendations should also be made before events involving mass gatherings (eg the Olympic Games and other international sporting events) if hosted in countries with ongoing outbreaks. This was done for the 2006 World Cup football championship held in Germany, where a measles outbreak was occurring at the time [54].

Improving the availability of high-quality information to both the public and health professionals is another key strategy stipulated in the WHO elimination plan [1]. As the incidence of measles decreases, so does awareness of the disease and motivation to vaccinate. Therefore, public and health professionals' knowledge and perception of measles, including the benefits and risks associated with vaccination, are important for health authorities seeking to increase and maintain high levels of vaccination coverage. As the incidence of measles decreases, there is also the risk of overemphasizing the rarely occurring adverse events after vaccination. Therefore, health authorities should focus more on reassuring the public on the benefits of measles vaccination and vaccine safety. The media and the Internet are powerful sources of health-related information to the public, and health authorities must actively work at providing valuable public communications and improved accessibility and quality of information on their own Web sites. Strategies to increase vaccination coverage through better information should also focus on family doctors and pediatricians, because they have a crucial role in the acceptance of childhood vaccinations [15]. Immunization modules and adequate training in public health aspects of vaccinology should be included in all medical and nursing curricula to improve vaccination knowledge and practices of future health care workers [55].

The outbreaks in the identified distinct groups and settings occurred wherever there was clustering of susceptible individuals sharing common risk factors. Transmission in some of these groups, both in their resident countries and across borders, is facilitated by demographic and social factors, such as high contact rates because of large family sizes, large social gatherings, and close interaction among their members. Even with overall high national vaccination coverage, measles outbreaks will continue to occur as long as such homogeneous low-coverage groups exist.

Roma, Travellers, and immigrants may not be benefiting from health care services and immunization programs available in their resident countries for various reasons. Some reasons, such as lack of information and misconceptions on vaccine safety, are common to those among the general population. However, such groups are often marginalized and discriminated against, resulting in their physical separation from the mainstream of social and economic life into segregated neighborhoods where health services are restricted or entirely unavailable. Full integration into a health care system may not be possible due to the mobility of some members of such groups. However, lack of citizenship [56] and registration with a health care facility may also act as barriers in obtaining health insurance coverage and social services [57, 58]. In Romania, in 2005, of an estimated 7% of the population that remained unregistered with a general practitioner, most were Roma [59]. Changing the health status of such groups is clearly a complex issue requiring long-term activities. Nevertheless, bringing vaccination services to segregated communities in outreach programs and implementing measures to reduce discrimination are examples of specific strategies that can better integrate vulnerable groups into health and social programs.

Convincing communities that harbor strong philosophical or religious objections to vaccination can be challenging even though numerous outbreaks continue to emerge from schools belonging to such communities. In Germany, the vaccination recommendations advertised by the public health authorities in local newspapers and handouts to parents and carers in schools and kindergartens, most of which embraced anthroposophy, were apparently ignored before the ensuing outbreak affected these communities [45]. Amongst ultra-orthodox Jewish communities, the reasons for not being vaccinated were not religious ones but believed to stem from poor motivation to be vaccinated against childhood diseases and community politics that opposed services provided by the health authorities [35, 60]. Other religious communities at risk are those belonging to the Christian Reformed Church in the Netherlands, whose members refrain from vaccination on religious grounds. They form a strongly coherent social group that has its own churches and schools and consists of large families. The 1999–2000 outbreak spread across the country along the so-called “Bible Belt,” a geographic area extending from the northeast to southwest of the country, where most such communities live [61].

Different strategies to improve vaccination coverage will be required in the different communities. Health authorities may need to involve sociologists, anthropologists and health communication experts to improve the understanding of peoples' attitudes toward vaccination and the social structure of vulnerable groups that are hard to reach by routine vaccination programs. Emphasis should be placed on identifying the key behavioral determinants of vulnerable groups. These behavioral profiles, together with any identified barriers to vaccination,

should be used to determine key messages. Communications profiling of susceptible groups should also be performed to better gauge which channels can be used to reach them. Investment in basic behavioral and communication operational research studies would also enable authorities to tailor future campaigns to better meet the informational needs of susceptible groups. Information on the disease and its prevention should be continually provided to such groups, and means to persuade parents in favor of vaccination should be explored. Ensuring the involvement of communities and key contact points, such as local leaders, in promoting vaccination, planning vaccination services, and informing families about the availability of vaccination services will be required.

Unvaccinated school children are at an increased risk to acquire and transmit measles in school settings [62, 63]. Children attending preschool facilities and daycare centers are particularly at risk, because many are not yet eligible for the second MCV dose. Children who attended anthroposophic schools were less likely to be fully vaccinated, compared with those attending other types of schools [64]. Therefore, schools predominantly attended by students with philosophical and religious exemptions have a greater potential for measles outbreaks. Some school authorities during school outbreaks in Austria and Switzerland excluded students without evidence of vaccination to limit measles transmission during school outbreaks [36, 38]. However, exclusion can result only in limited control and more active prevention measures, including routine immunization requirements before school entry, such as those in the United States, are an approach to consider adopting in Europe.

Nosocomial transmission is of great concern not only because of the potential of spread to the general population but also because of possible serious complications in infants and adults and particularly in immunodeficient patients who cluster in hospitals and health care settings. The risk of transmission is especially increased if there is a delay or failure to diagnose an infection. This results from physicians' inexperience with an increasingly infrequent disease and the possible absence of rash in severely immunodeficient patients [6]. Increased transmission can also be attributed to failure to isolate the infectious patient or to notify the case in time so that infection control measures can be implemented. As measles remains a risk for health care workers who have not acquired natural immunity and have not been vaccinated, all hospitals and health care settings need to have in place infection control guidelines on the prevention and control of measles. These should include pre- and post-exposure prophylaxis policies and measures to ensure that all health care workers are adequately protected [65]. Offering susceptible health care workers MMR vaccination has been made a quality standard for all health care staff in the United States [66], and a similar approach may also be warranted in Europe.

All countries should have the ability to detect measles cases rapidly and adopt preventive and control measures without delay

to limit measles transmission. Indeed, strengthening surveillance systems is another key strategy of the elimination plan [1]. Enhanced surveillance with the use of measles virus characterization tools is important to ascertain transmission chains, to assess country-specific risk, and for documenting the interruption of endemic measles transmission. Importations of measles have highlighted the presence of pockets of susceptible individuals among the general population and particular groups. Failure to identify who gets measles and implement the elimination strategies in all European countries raises concerns for the successful and sustainable elimination of measles in Europe.

## Funding

This work was supported by the Department of Epidemiology, Statens Serum Institut, Denmark.

## Acknowledgments

I am indebted to Kåre Mølbak, Steffen Glismann, Sabrina Bacci, Rebecca Martin, and Robb Butler, and especially to Nino Khetsuriani, for contributing valuable suggestions and adding useful comments; Antonietta Filia, Jean-Luc Richard, and Joanne White and Ole Wichmann, for further comments and suggestions. For the text in the appendix I thank Henry Scicluna and Michael Guet, for providing information and editing the section on Roma communities; Maria Daly and Zoe Matthews for providing further information and editing the section on Travellers; Günter Pfaff, for providing information on anthroposophic communities; and Chen Stein-Zamir, for editing the section on ultra-orthodox Jewish communities. I am also grateful to Christian Damsgaard Pedersen for library assistance.

## References

1. WHO. Eliminating measles and rubella and prevention congenital rubella infection, WHO European region strategic plan 2005–2010. [http://www.euro.who.int/\\_\\_data/assets/pdf\\_file/0008/79028/E87772.pdf](http://www.euro.who.int/__data/assets/pdf_file/0008/79028/E87772.pdf). Accessed 10 February 2011.
2. Muscat M, Bang H, Wohlfahrt J, Glismann S, Mølbak K, for the EUVAC.NET group. Measles in Europe: an epidemiological assessment. *Lancet* **2009**; 373:383–9.
3. Strebel PM, Papania MJ, Dayan GH, Halsey NA. Measles vaccine. In: Plotkin SA, Orenstein WA and Offit PA eds. *Vaccines*. 5th ed. St Louis, Saunders **2008**.
4. Markowitz LE, Preblud SR, Fine PE, Orenstein WA. Duration of live measles vaccine induced immunity. *Pediatr Infect Dis J* **1990**; 9:101–110.
5. WHO. EURO Immunization Monitor. WHO, Regional Office for Europe. **2009**. [http://www.euro.who.int/\\_\\_data/assets/pdf\\_file/0010/98956/Euro\\_Immun\\_Mon\\_Feb\\_2009.pdf](http://www.euro.who.int/__data/assets/pdf_file/0010/98956/Euro_Immun_Mon_Feb_2009.pdf). Accessed 10 February 2011.
6. Kaplan LJ, Daum RS, Smaron M, McCarthy CA. Severe measles in immunocompromised patients. *JAMA* **1992**; 267:1237–41.
7. Filia A, De Crescenzo M, Seyler T, et al. Measles resurges in Italy: preliminary data from September 2007 to May 2008. *Euro Surveill* **2008**; 13:18928. <http://www.eurosurveillance.org/ViewArticle.aspx?ArticleId=18928>.
8. Health Protection Agency, UK. Increase in measles cases in 2006, in England and Wales. <http://www.hpa.org.uk/cdr/archives/2006/cdr1206.pdf>. Accessed 05 March 2010.
9. Alfredsson R, Svensson E, Trollfors B, Borres MP. Why do parents hesitate to vaccinate their children against measles, mumps and rubella? *Acta Paediatr* **2004**; 93:1232–7.
10. Smith A, Yarwood J, Salisbury DM. Tracking mothers' attitudes to MMR immunisation 1996–2006. *Vaccine* **2007**; 25:3996–4002.



11. The Editors of The Lancet. Retraction—Ileal-lymphoid-nodular hyperplasia, non-specific colitis, and pervasive developmental disorder in children. *Lancet* **2010**; 375:445.
12. White JM, Rush M, Leon S, Ramsay MEB. COVER/Körner 95-1 (April to June 1995) vaccination coverage statistics for children up to 2 years old in the United Kingdom. *Commun Dis Rep CDR Wkly* **1995**; 5:R186–7. <http://www.hpa.org.uk/cdr/archives/CDRreview/1995/cdr1295.pdf>. Accessed 10 June 2010.
13. Health Protection Agency. COVER programme: april to June 2003. *Commun Dis Rep CDR Wkly* **2003**; 13. <http://www.hpa.org.uk/cdr/archives/2003/cdr3903.pdf>.
14. Poethko-Müller C, Ellert U, Kuhnert R, Neuhauser H, Schlaud M, Schenk L. Vaccination coverage against measles in German-born and foreign-born children and identification of unvaccinated subgroups in Germany. *Vaccine* **2009**; 27:2563–9.
15. Zucs AP, Crispin A, Eckl E, Weitkunat R, Schlipkötter U. Risk factors for undervaccination against measles in a large sample of preschool children from rural Bavaria. *Infection* **2004**; 32:127–33.
16. Lernout T, Kissling E, Hutse V, De Schrijver K, Top G. An outbreak of measles in orthodox Jewish communities in Antwerp, Belgium, 2007–2008: different reasons for accumulation of susceptibles. *Euro Surveill* **2009**; 14:19087. <http://www.eurosurveillance.org/ViewArticle.aspx?ArticleId=19087>. Accessed 19 March 2010.
17. Ciofi degli Atti ML, Rota MC, Bella A, Salmaso S, Gruppo di Lavoro ICONA. Do changes in policy affect vaccine coverage levels? Results of a national study to evaluate childhood vaccination coverage and reasons for missed vaccination in Italy. *Vaccine* **2004**; 22: 4351–7.
18. Greenberg SB. 'Bacilli and bullets': William Osler and the anti-vaccination movement. *South Med J* **2000**; 93:763–7.
19. Spika J, Aidyralieva C, Mukharskaya L, et al. Measles outbreak in the Ukraine, 2005–2006. *Euro Surveill* **2006**; 11:E060309.1 <http://www.eurosurveillance.org/ew/2006/060309.asp#1>. Accessed 19 March 2010.
20. Ciofi degli Atti ML, Fabi F, Salmaso S, Pizzuti R, de Campora E. Measles epidemic attributed to inadequate vaccination coverage. Campania, Italy, 2002. *MMWR* **2003**; 52:1044–7.
21. Bonanni P, Bergamini M. Factors influencing vaccine uptake in Italy. *Vaccine* **2001**; 20:S8–S12.
22. Watson JC, Pearson JA, Markowitz LE, et al. An evaluation of measles revaccination among school-entry-aged children. *Pediatrics* **1996**; 97:613–8.
23. St Sauver JL, Dhiman N, Ovsyannikova IG, et al. Extinction of the human leukocyte antigen homozygosity effect after two doses of the measles-mumps-rubella vaccine. *Hum Immunol* **2005**; 66:788–98.
24. Albrecht P, Ennis FA, Saltzman EJ, Krugman S. Persistence of maternal antibody in infants beyond 12 months: mechanism of measles vaccine failure. *J Pediatr* **1977**; 91:715–8.
25. Anders JF, Jacobson RM, Poland GA, et al. Secondary failure rates of measles vaccines: a meta-analysis of published studies. *Pediatr Infect Dis J* **1996**; 15:62–6.
26. Mathias R, Meekison J, Arcand T, et al. The role of secondary vaccine failures in measles outbreaks. *Am J Public Health* **1989**; 79:475–8.
27. Hirose M, Hidaka Y, Miyazaki C, Ueda K, Yoshikawa H. Five cases of measles secondary vaccine failure with confirmed seroconversion after live measles vaccination. *Scand J Infect Dis* **1997**; 29:187–90.
28. Samoilovich EO, Yermalovich MA, Semeiko GV, Svirchevskaya EI, Rimzha MI, Titov LP. Outbreak of measles in Belarus, January–June 2006. *Euro Surveill* **2006**; 11. <http://www.eurosurveillance.org/ew/2006/060727.asp#3>. Accessed 19 March 2010.
29. Muscat M, Vinner L, Christiansen AH, Glismann S, Böttiger B. The benefit of molecular characterization during a measles upsurge in Denmark. *Vaccine* **2007**; 25:6232–6.
30. Marinova L, Muscat M, Mihneva Z, Kojouharova M. An update on an ongoing measles outbreak in Bulgaria, April–November 2009. *Euro Surveill* **2009**; 14:19442. <http://www.eurosurveillance.org/ViewArticle.aspx?ArticleId=19442>. Accessed 19 March 2010.
31. Orlikova H, Rogalska J, Kazanowska-Zielinska E, et al. Spotlight on measles 2010: a measles outbreak in a Roma population in Pulawy, eastern Poland, June to August 2009. *Euro Surveill* **2010**; 15:19550. <http://www.eurosurveillance.org/ViewArticle.aspx?ArticleId=19550>. Accessed 30 April 2010.
32. Gíria M, Rebelo-de-Andrade H, Fernandes T, Pedro S, Freitas G. Report on the measles situation in Portugal. *Euro Surveill* **2008**; 13:19010 <http://www.eurosurveillance.org/ViewArticle.aspx?ArticleId=19010>. Accessed 19 March 2010.
33. Løvoll Ø, Vonen L, Nordbø S, et al. Outbreak of measles among Irish Travellers in Norway: an update. *Euro Surveill* **2007**; 12:E070614.2 <http://www.eurosurveillance.org/ew/2007/070614.asp#2>. Accessed 19 March 2010.
34. García-Comas L. Measles outbreak in the region of Madrid, Spain, 2006. *Euro Surveill* **2006**; 11:E060330.3. <http://www.eurosurveillance.org/ew/2006/060330.asp#3>. Accessed 19 March 2010.
35. Stein-Zamir C, Abramson N, Shoob H, Zentner G. An outbreak of measles in an ultra-orthodox Jewish community in Jerusalem, Israel, 2007—an in-depth report. *Euro Surveill* **2008**; 13:8045 pii=http://www.eurosurveillance.org/ViewArticle.aspx?ArticleId=8045.
36. Schmid D, Holzmann H, Schwarz K, et al. Measles outbreak linked to a minority group in Austria, 2008. *Epidemiol Infect* **2010**; 138:415–25.
37. Kaic B, Gjenero-Margan I, Kurecic-Filipovic S, Muscat M. A measles outbreak in Croatia, 2008. *Euro Surveill* **2009**; 14 19083 <http://www.eurosurveillance.org/ViewArticle.aspx?ArticleId=19083>. Accessed 19 March 2010.
38. Richard JL, Masserey Spicher V. Large measles epidemic in Switzerland from 2006 to 2009: consequences for the elimination of measles in Europe. *Euro Surveill* **2009**; 14:19443 <http://www.eurosurveillance.org/ViewArticle.aspx?ArticleId=19443>. Accessed 19 March 2010.
39. Boncompagni G, Incandela L, Bechini A, et al. Measles outbreak in Grosseto, central Italy, 2006. *Euro Surveill* **2006**; 11:3015. <http://www.eurosurveillance.org/ViewArticle.aspx?ArticleId=3015>. Accessed 19 March 2010.
40. Waku-Kouomou D, Freymuth F, du Châtelet IP, Wild TF, Horvat B. Co-circulation of multiple measles virus genotypes during an epidemic in France in 2008. *J Med Virol* **2010**; 82:1033–43. Accessed 06 May 2010.
41. Follin P, Dotevall L, Jertborn M, et al. Effective control measures limited measles outbreak after extensive nosocomial exposures in January–February 2008 in Gothenburg, Sweden. *Euro Surveill* **2008**; 13:18937. <http://www.eurosurveillance.org/ViewArticle.aspx?ArticleId=18937>.
42. Groth C, Böttiger BE, Plesner A, Christiansen AH, Glismann S, Høgh B. Nosocomial measles cluster in Denmark following an imported case, December 2008–January 2009. *Euro Surveill* **2009**; 14:19126. <http://www.eurosurveillance.org/ViewArticle.aspx?ArticleId=19126>. Accessed 19 March 2010.
43. Muscat M, Christiansen AH, Böttiger BE, Plesner A, Glismann S. A cluster of measles cases in Denmark following importation, January and February 2008. *Euro Surveill* **2008**; 13:8050. <http://www.eurosurveillance.org/ViewArticle.aspx?ArticleId=8050>. Accessed 19 March 2010.
44. Domínguez A, Torner N, Barrabeig I, et al. Large outbreak of measles in a community with high vaccination coverage: implications for the vaccination schedule. *Clin Infect Dis* **2008**; 47:1143–9.
45. Siedler A, Tischer A, Mankertz A, Santibanez S. Two outbreaks of measles in Germany 2005. *Euro Surveill* **2006**; 11:131–4. <http://www.eurosurveillance.org/em/v11n04/1104–225.asp>. Accessed 19 March 2010.
46. Delaporte E, Wyler CA, Sudre P. Outbreak of measles in Geneva, Switzerland, March–April 2007. *Euro Surveill* **2007**; 12:3190. <http://www.eurosurveillance.org/ViewArticle.aspx?ArticleId=3190>. Accessed 19 March 2010.
47. Richard JL, Masserey Spicher V. Ongoing measles outbreak in Switzerland: results from November 2006 to July 2007. *Euro*

- Surveill **2007**; 12:<http://www.eurosurveillance.org/ViewArticle.aspx?ArticleId=3241>. Accessed 19 March 2010.
48. Jacobson Vann JC, Szilagyi P. Patient reminder and recall systems to improve immunization rates. *Cochrane Database Syst Rev* **2005**. Issue 3. Art. No.: CD003941. DOI: 10.1002/14651858.CD003941.pub2.
  49. Bates SA, Wolinsky FD. Socioeconomically Disadvantaged Urban children personal, Financial, and Structural barriers to immunization. *Pediatrics* **1998**; 101:591–6.
  50. Rota J, Lowe L, Rota P, et al. Identical genotype B3 sequences from measles patients in 4 countries, 2005. *Emerg Infect Dis* **2006**; 12:1779–81. <http://www.cdc.gov/ncidod/EID/vol12no11/06-0635.htm>. Accessed 19 March 2010.
  51. Institute of Tropical Medicine, Antwerp, Belgium. Belgian consensus Meeting on travel medicine (13 June 2008). <http://www.itg.be/itg/uploads/medserv/report2008.pdf>. Accessed 19 September 2008.
  52. Glismann S. MMR for travel abroad. *EPI-NEWS* **2006**; 25: <http://www.ssi.dk/English/News/EPI-NEWS/2010/~media/Indhold/EN%20-%20engelsk/EPI-NEWS/2006/PDF/EPI-NEWS%20-%202006%20-%20No%2025.ashx>. Accessed 16 March 2011.
  53. Department of Health. Salisbury D, Ramsay M, Noakes K eds: Immunisation against infectious disease, 2006, 3rd Edition. London, **2006**. [http://www.dh.gov.uk/prod\\_consum\\_dh/groups/dh\\_digitalassets/documents/digitalasset/dh\\_116472.pdf](http://www.dh.gov.uk/prod_consum_dh/groups/dh_digitalassets/documents/digitalasset/dh_116472.pdf). Accessed 30 March, 2010.
  54. Krause G, Siedler A, Schenkel K, Steffens I. Editorial team. Measles vaccination advised before travel to World Cup in Germany, but risk of measles infection low. *Euro Surveill* **2006**; 11:2976 <http://www.eurosurveillance.org/ViewArticle.aspx?ArticleId=2976>. Accessed 19 March 2010.
  55. Zimmerman RK, Barker WH, Strikas RA, et al. Developing curricula to promote preventive medicine skills. The Teaching immunization for medical education (TIME) Project. TIME development Committee. *JAMA* **1997**; 278:705–11.
  56. Sepkowitz K. Health of the world's Roma population. *Lancet* **2006**; 367:1707–8.
  57. European Roma Rights Centre. Ambulance not on the way: the disgrace of healthcare for Roma in Europe, European Roma Rights Centre, Budapest, Hungary: Westimprim bt, **2006**. <http://www.errc.org/cikk.php?cikk=2632>. Accessed 19 March 2010.
  58. Rechel B, McKee M. Health systems and policies in South-Eastern Europe. In: WHO, ed: Health and economic development in south-eastern Europe. Paris: World Health Organization, **2006**; 43–69.
  59. Vladescu C, Scintea G, Olsavszky V, Allin S, Mladovsky P. Romania: health system review. Copenhagen: Health systems in transition, World Health Organization, on behalf of the European Observatory on Health Systems and Policies, **2008**; 1–172.
  60. Anis E, Grotto I, Moerman L, et al. Measles in a highly vaccinated society: the 2007–08 outbreak in Israel. *J Infect* **2009**; 59:252–8.
  61. van den Hof S, Conyn-van Spaendonck MA, van Steenberghe JE. Measles epidemic in the Netherlands, 1999–2000. *J Infect Dis* **2002**; 186:1483–6.
  62. Salmon DA, Haber M, Gangarosa EJ, et al. Health consequences of religious and philosophical exemptions from immunization laws: individual and societal risk of measles. *JAMA* **1999**; 282:47–66.
  63. Feikin DR, Lezotte DC, Hamman RF, et al. Individual and community risks of measles and pertussis associated with personal exemptions to immunization. *JAMA* **2000**; 284:3145–50.
  64. van der Wal MF, Diepenmaat AC, Pel JM, Hirasing RA. Vaccination rates in a multicultural population. *Arch Dis Child* **2005**; 90:36–40.
  65. Biellik RJ, Clemens CJ. Strategies for minimizing nosocomial measles transmission. *Bull World Health Organ* **1997**; 75:367–75.
  66. Krause PJ, Gross PA, Barrett TL, et al. Quality standard for assurance of measles immunity among healthcare workers. Infectious Diseases Society of America. *Clin Infect Dis* **1994**; 18:431–6.
  67. Kremer JR, Brown KE, Jin L, et al. High genetic diversity of measles virus, World Health Organization European region, 2005–2006. *Emerg Infect Dis* **2008**; 14:107–14. <http://www.cdc.gov/EID/content/14/1/107.htm>. Accessed 19 March 2010.
  68. Georgakopoulou T, Grylli C, Kalamara E, Katerelos P, Spala G, Panagiotopoulos T. Current measles outbreak in Greece. *Euro Surveill* **2006**; 11:<http://www.eurosurveillance.org/ViewArticle.aspx?ArticleId=2906>. Accessed 19 March 2010.
  69. Filia A, Curtale F, Kreidl P, et al. Cluster of measles cases in the Roma/Sinti population, Italy, June–September 2006. *Euro Surveill* **2006**; 11:E061012.2 <http://www.eurosurveillance.org/ew/2006/061012.asp#2>. Accessed 19 March 2010.
  70. Curtale F, Perrelli F, Mantovani J, et al. Description of two measles outbreaks in the Lazio Region, Italy (2006–2007). Importance of pockets of low vaccine coverage in sustaining the infection. *BMC Infect Dis* **2010**; 10:62 doi:10.1186/1471-2334-10-62. Accessed 20 April 2010.
  71. Seguliev Z, Duric P, Petrovic V, et al. Current measles outbreak in Serbia: a preliminary report. *Euro Surveill* **2007**; 12:E070315.2 PubMed PMID: 17439786. <http://www.eurosurveillance.org/ViewArticle.aspx?ArticleId=3155>. Accessed 19 March 2010.
  72. Cohuet S, Bukasa A, Heathcock R, et al. A measles outbreak in the Irish traveller ethnic group after attending a funeral in England, March–June 2007. *Epidemiol Infect* **2009**; 27:1–7.
  73. van Velzen E, de Coster E, van Binnendijk R, Hahné S. Measles outbreak in an anthroposophic community in The Hague, The Netherlands, June–July 2008. *Euro Surveill* **2008**; 13:18945. <http://www.eurosurveillance.org/ViewArticle.aspx?ArticleId=18945>. Accessed 19 March 2010.
  74. Kasper S, Holzmann H, Aberle SW, et al. Measles outbreak in Styria, Austria, March–May 2009. *Euro Surveill* **2009**; 14:19347. <http://www.eurosurveillance.org/ViewArticle.aspx?ArticleId=19347>. Accessed 19 March 2010.
  75. Gee S, Cotter S, O'Flanagan D. on behalf of the national incident management team. Spotlight on measles 2010: measles outbreak in Ireland 2009–2010. *Euro Surveill* **2010**; 15:19500 <http://www.eurosurveillance.org/ViewArticle.aspx?ArticleId=19500>. Accessed 19 March 2010.
  76. Perucha M, Ramalle-Gómara E, Lezaun ME, et al. A measles outbreak in children under 15 months of age in La Rioja, Spain, 2005–2006. *Euro Surveill* **2006**; 11:649. <http://www.eurosurveillance.org/ViewArticle.aspx?ArticleId=649>. Accessed 19 March 2010.
  77. Wichmann O, Siedler A, Sagebiel D, et al. Further efforts needed to achieve measles elimination in Germany: results of an outbreak investigation. *Bull World Health Organ* **2009**; 87:108–15.
  78. Chironna M, Prato R, Sallustio A, et al. Genetic characterization of measles virus strains isolated during an epidemic cluster in Puglia, Italy. *Virology* **2007**; 21:90.
  79. Bernard H, Santibanez S, Siedler A, Ludwig MS, Hautmann W. An outbreak of measles in Lower Bavaria, Germany, January–June 2007. *Euro Surveill* **2007**; 12:3278. <http://www.eurosurveillance.org/ViewArticle.aspx?ArticleId=3278>. Accessed 19 March 2010.
  80. Bernard H, Fischer R, Wildner M. Ongoing measles outbreak in southern Bavaria, Germany. *Euro Surveill* **2008**; 13:8002. <http://www.eurosurveillance.org/ViewArticle.aspx?ArticleId=8002>. Accessed 31 March 2010.
  81. Parent du Châtelet I, Floret D, Antona D, Lévy-Bruhl D. Measles resurgence in France in 2008, a preliminary report. *Euro Surveill* **2009**; 14:19118. <http://www.eurosurveillance.org/ViewArticle.aspx?ArticleId=19118>. Accessed 19 March 2010.
  82. Pfaff G, Mezger B, Santibanez S, et al. A. Measles in south-west Germany imported from Switzerland - a preliminary outbreak description. *Euro Surveill* **2008**; 13:8044. <http://www.eurosurveillance.org/ViewArticle.aspx?ArticleId=8044>. Accessed 19 March 2010.
  83. Heathcock R, Watts C. Measles outbreaks in London, United Kingdom - a preliminary report. *Euro Surveill* **2008**; 13:18829. <http://www.eurosurveillance.org/ViewArticle.aspx?ArticleId=18829>. Accessed 19 March 2010.

84. van Binnendijk RS, Hahné S, Timen A, et al. Air travel as a risk factor for introduction of measles in a highly vaccinated population. *Vaccine* **2008**; 26:5775–7.
85. Caputi G, Tafuri S, Chironna M, et al. An outbreak of measles including nosocomial transmission in Apulia, south-east Italy, January-March 2008—a preliminary report. *Euro Surveill* **2008**; 13:18839. <http://www.eurosurveillance.org/ViewArticle.aspx?ArticleId=18839>. Accessed 19 March 2010.
86. Fraser A. *Gypsies (Peoples of Europe)*, 2nd ed. Oxford: Blackwell, **1992**. ISBN 978–0631196051.
87. Liégeois JP. *Gypsies. An illustrated history*. London: Saqi Books, **1986**.
88. EU-MIDIS. European union minorities and discrimination survey - Main results report. European Union Agency for Fundamental Rights, **2009**. ISBN 13: 978–9291924615. [http://fra.europa.eu/fraWebsite/attachments/eumidis\\_mainreport\\_conference-edition\\_en\\_.pdf](http://fra.europa.eu/fraWebsite/attachments/eumidis_mainreport_conference-edition_en_.pdf). Accessed 24 March 2010.
89. UNDP. Report on the Roma in central and eastern Europe - Avoiding the Dependency Trap, **2002**. <http://europeandcis.undp.org/home/show/62BBCD48-F203-1EE9-BC5BD7359460A968>. Accessed 8 April 2011.
90. McKee M. The health of gypsies. *BMJ* **1997**; 315:1172–3.
91. Braham M. *The untouchables: a survey of Roma people of central and eastern Europe*. Geneva: UNHCR, **1993**.
92. Decade of Roma inclusion 2005–2015. <http://www.romadecade.org>. Accessed 04 January 2010.
93. Communities and Local Government. *Gypsies and Travellers-Facts and Figures- March 2004*. <http://www.communities.gov.uk/archived/publications/housing/gypsiestravellers?view=Standard>. Accessed 07 March 2011.
94. Department of Health and children, Ireland, September **2010**. All Ireland Traveller Health Study—Our Geels. [http://www.dohc.ie/publications/traveller\\_health\\_study.html](http://www.dohc.ie/publications/traveller_health_study.html). Accessed 07 March 2011.
95. Helleiner J. *Irish Travellers: Racism and the Politics of Culture*. Toronto: University of Toronto Press, **2000**. ISBN 9780802086280.
96. Murphy JFA. Traveller health: a national strategy 2002–2005. *Ir Med J* **2002**; 95:164.
97. Communities and Local Government. *Count of gypsy and traveller caravans - July 2009*. <http://www.communities.gov.uk/documents/statistics/xls/1277951.xls>. Accessed 24 March 2010.
98. Parry G, Van Cleemput P, Peters J, et al. *The health status of gypsies and travellers in England*. Sheffield: University of Sheffield, **2004**. <http://www.shef.ac.uk/content/1/c6/02/55/71/GT%20report%20summary.pdf>. Accessed 23 February 2010.
99. Hawes D. *Gypsies, travellers and the health service—a study in inequality*. Bristol: The Policy Press, **1997**.
100. Jenkins M. *No Travellers! A report of Gypsy and Traveller Women’s experiences of Maternity Care*. London: Maternity Alliance, **2004**.
101. Cemlyn S, Greenfields M, Burnett S, Matthews Z, Whitwell C. *Inequalities experienced by gypsy & traveller communities: a review* University of Bristol, Buckinghamshire New University. UK Equality and Human Rights Commission, **2009**. <http://www.ucl.ac.uk/gheg/marmotreview/travellersinequalities>. Accessed 23 February 2010.
102. Lawrence H. On the road to better health. *Emerg Nurse* **2007**; 15:12–17.
103. Friends, Families and Travellers Support Group. *Report of the Pilot health Promotion project with travellers in Dorset 1997–98*. Brighton: Friends, Families and Travellers, **1998**.
104. Jeffrey J, Davis J, Hoult H. Afro-Caribbean and travelling families’ health needs. In: Rowbotham A, Sheldrake D eds: *Health visiting specialist and higher level practice*. Ch. 17. Edinburgh: Churchill Livingstone, **2000**; 373–97.
105. Feder G, Vaclavik T, Streetly A. Traveller Gypsies and childhood immunisation: a study in east London. *Br J Gen Pract* **1993**; 43:281–4.
106. Steiner R. *Anthroposophical Leading Thoughts. Anthroposophy as a Path of Knowledge*. London: Rudolf Steiner Press, **1973**. ISBN/LCN 0-85440 268 3 [Translated from original in German. *Anthroposophische Leitsätze. Der Erkenntnisweg der Anthroposophie*. Das Michael Mysterium. (Bibl. No. 26) 6th edition] [http://wn.rsarchive.org/Books/GA026/English/RSP1973/GA026\\_index.html](http://wn.rsarchive.org/Books/GA026/English/RSP1973/GA026_index.html). Accessed 25 February 2010.
107. Zander H. *Anthroposophie in Deutschland. Theosophische Weltanschauung und gesellschaftliche Praxis 1884–1945*—[Anthroposophy in Germany. Theosophical weltanschauung and societal practice 1884–1945]. Göttingen: Vandenhoeck und Rupprecht, **2007**. [In German] ISBN 978–3525554524.
108. Bund der Freien Waldorfschulen. <http://www.waldorfschule.info/de/schulen/index.html>. Accessed 08 March 2011.
109. Camphill communities. <http://www.camphill.net>. Accessed 25 February 2010.
110. Soldner G. Leitlinie Masern und Masern-Impfung [Guideline measles and measles vaccination]. *Der Merkurstab J Anthroposophic Med* **2008**; 61:601–5 [In German].
111. Faber W. Zur Leitlinie Masern und Masern-Impfung (Merkurstab 6/08) [On the guideline measles and measles vaccination (Merkurstab 6/08)]. Letter to the editor [In German]. *Der Merkurstab - J Anthroposophic Med* **2009**; 62:86.
112. A Journalist’s Guide to Judaism, centre for Faith and media website, Resources, Religion Guides, pp. 2–3. [http://www.faithandmedia.org/cms/uploads/files/8\\_guide-judaism.pdf](http://www.faithandmedia.org/cms/uploads/files/8_guide-judaism.pdf). Accessed 26 February 2010.
113. Choshen M ed: *Population of Israel and Jerusalem by population group, 2007–2008*. Jerusalem: Statistical Yearbook of Jerusalem No. 23–2007/2008, **2009**; 100–7.

## Appendix Background information on the particular groups affected by measles in Europe

### Roma

- Roma form a significant ethnic group living mostly in Central and South-eastern Europe but also in other European countries, the Americas, the former Soviet Union, the Middle East, and North Africa. Current estimates of the total Roma population in the European Union range from 6 million to 8 million. Accurate estimations are however, difficult because of infrequent data collection, the Roma’s mobility, and their reluctance to register as "Roma" in censuses for fear of being stigmatized.
- The origins of the Roma people have for centuries been subject to speculations and debate. Today, based on linguistics, physical anthropology and ethnic similarities there is broad consensus that Roma originated in Northern India [86] which they left a thousand or more years ago. Their appearance in Europe was first recorded in the early 1300s in South-eastern Europe (Byzantium, Greece and the Balkans) from where they spread to Central and Eastern Europe in the 1400s and Western and Northern Europe in the early 1500s [86, 87].
- Roma comprise of several groups including the Kalderash, the Machavaya, the Lovari, the Churari, the Romanichal, the Gitanos (Calé), and the Sinti amongst others. Of numerous terms used to refer to these groups, the terms Rom, Roma, Romani, or Rroma, are preferred as the term “Gypsy” is considered derogatory. In this article the word “Gypsy” is only used in quotes from other authors.
- The Romani language spoken by Roma is of Indo-Aryan origin and has many variants. Roma have diverse culture and traditions and all groups have their own individual beliefs and customs. Today, the vast majority live in permanent housing. However, many are still mobile for family and economic reasons.

- Throughout history, Roma have been marginalised and their basic human rights abused. Following the political changes in Eastern Europe in the 1990s anti-Roma sentiment in Europe have rekindled. Roma remain the least integrated people of Europe. Discrimination against Roma in employment, education, health care, administrative and other services has been reported [88].
- In many countries, health indicators such as life expectancy, child mortality, rate of infection and chronic diseases among Roma communities indicate drastic differences compared with the health indicators among the general population [89]. Research on the health of the Roma is limited and difficult to access [90] but some studies suggested a fourfold increase in infant mortality and a 10-year deficit in life expectancy [91].
- A political commitment by European governments to improve the socioeconomic status and social inclusion of Roma is being made through the initiative - *Decade of Roma Inclusion 2005–2015*, [92]. It represents the first multinational project in Europe to improve the socio-economic status and social inclusion of Roma in Europe by focusing on the priority areas of education, employment, health, and housing and commits governments to take into account other core issues such as poverty and discrimination.

### Travellers

- Travellers are a nomadic people of Irish origin forming a minority group living mostly in Ireland and Great Britain. Arguably, they are sometimes collectively referred to as Irish Travellers. Travellers have their own language, values, beliefs and customs. Their language has two names, Gammon (or Gamin) and Cant, although academic linguistics often refer to it as Shelta.
- It is difficult to establish accurately the number of Travellers in Britain as they are not identifiable as a separate ethnic group in the census although they are recognised in British law as an ethnic group [93]. As a result estimates of the Traveller population in Britain vary widely—from 82,000 to 300,000 [93]. The Traveller population on the island of Ireland was estimated at 40,129 in 2008; 36,224 in the Republic of Ireland and 3,905 in Northern Ireland [94].
- The historical origin of Travellers as a group has been a subject of academic and popular debate [95]. However, many are thought to be descendants of people who were dispossessed of their land in the 16<sup>th</sup> century while others were left homeless as a result of the Irish potato famine in the 19<sup>th</sup> century. Further back to the 12<sup>th</sup> Century there is evidence of a group of travelling crafts people who played an important role in Irish society and Irish economy. Others were nomadic tradesmen dating back to 200 AD [96]. They travelled throughout Ireland and also across to Great Britain where they settled particularly in the 1950s and 1960s. Many live on sites, both council and private, some have moved into houses and many still have nowhere to camp and live on unauthorised sites constantly being moved on. According to the annual Caravan Count completed by local governments in 2009 there were 17,437 caravans belonging to Gypsy and Traveller families in England [97].

- Hybrid groups have sometimes emerged particularly in England as a result of cultural and social exchanges between Travellers and Roma. Indeed, separating groups of Roma from Travellers is often arbitrary [87]. The terms “Travelling People” and “Gypsy-Travellers” have been used to describe nomadic people.
- The *All Ireland Traveller Health Study* showed that compared with the general population, Travellers across the island of Ireland, North and South, have poorer outcomes in the areas of health, education and employment [94]. Travellers are reported to have higher rates of mortality in all age cohorts including infants and high rates of miscarriages and stillbirths [94,98].
- While access to health services was recently reported to be good on the island of Ireland [94], UK studies have shown the most common problem for Travellers is difficulty in accessing primary care through general practitioners because of their insistence in having a permanent address. Some general practitioners only register families as temporary residents, resulting in exclusion from a range of services, such as screening. Others allegedly refuse to register “Gypsies” and Travellers at all [99–101]. Difficulties in accessing health services such as minor injuries units and immunization programs have been described [102]. Low levels of immunization for children can be a particular problem where families are highly mobile, continuity of care is lacking, and specialist health visitors for the Roma and Traveller communities are not always available [103–105].

### Anthroposophic communities

- Anthroposophy is a spiritual philosophy based on the teachings of Austrian-born Rudolf Steiner (1861–1925), who described it as “a way of knowledge—a cognitive path—that leads the spiritual in the human being to the spiritual in the universe” [106].
- Historically, anthroposophy originated from a tradition of esoteric thoughts on occult wisdom that gained a measure of popularity in the Anglo-Saxon world and in Germany during the 1880s. Anthroposophic concepts stem from European and Christian traditions and beliefs together with Eastern ones, including reincarnation and karma [107]. They have found applications in a variety of fields, including education, medicine, architecture, arts and agriculture.
- Steiner viewed the development of human life from the beginning of its existence in four stages: a physical body, common to the inorganic world; a etheric (life) body, common to plants, animals and humans; an astral (conscious) body, common to all animals and humans; and the ego (self-awareness), unique to humans [107]. The physical body is believed to develop during the first seven years of life, until the loss of deciduous teeth. Thereafter, the etheric body is unfolded and develops in a second step which lasts until puberty, when the astral body begins to develop.
- Steiner considered disease and healing processes as crises in which conflicts of an earlier earthly existence with the present bodily existence are resolved. Hence, measles, and other childhood diseases are perceived as opportunities for the development of the physical and the etheric body. After puberty, measles is no longer seen as helpful in this developmental process,

as a higher risk of complications is well recognized. Hence, anthroposophic physicians usually refrain from supporting measles immunization programs in early childhood but do not oppose parents' decisions to immunise their children.

- The number of individuals who adhere to anthroposophy and of physicians who offer anthroposophic medicine is not known. However, as of January 2011, there were reportedly 998 Steiner (also known as Waldorf) schools worldwide which follow anthroposophic concepts of education, with 222 schools in Germany and 464 schools in other European countries. In addition, there were about 1,500 Waldorf kindergartens worldwide [108], and more than 100 centers known as Camphill communities that provide opportunities for individuals with learning disabilities, mental health problems and other special needs [109].
- Recent statements have challenged further adherence to a nonvaccination strategy in the light of changing measles epidemiology. In 2008, the German Association of Anthroposophic Physicians issued a directive on measles and measles vaccination [110]. While maintaining the view that the overcoming of a disease such as measles, may contribute to the strengthening of children during their physical development, it is stated that Rudolf Steiner was not an adversary of immunizations, and that a spiritual education may compensate for the protective effects of immunizations against disease. A controversial debate among anthroposophic physicians on the subject is ongoing [111].
- Not all parents of children attending Steiner educational institutions adhere to the anthroposophic school of thought on immunizations. Some parents simply choose such alternative educational institutions for their children in favour of more general ones. Some may even be unaware of the philosophy and others may be vaccine sceptics. Therefore, a variety of reasons explaining the low immunization levels in these institutions need to carefully be considered.

### Ultra-orthodox Jewish communities

- Members of the ultra-orthodox Jewish communities follow a theologically conservative form of Judaism called Haredi Judaism. Use of the term "ultraorthodox" is considered controversial, even pejorative as it implies extremism [112]. The communities are not part of a homogeneous population and represent many subgroups that differ in specific cultural and religious practices, each tending to follow their specific spiritual and rabbinic authorities. They constitute about 38% of the Jewish population of Jerusalem and about 8% of the general population in Israel [113], with sizeable communities in other countries mainly UK, USA, Canada, France, Belgium, Australia and Argentina.
- In Israel, these communities lean toward large families, overcrowded living conditions and a relatively low socio-economic status. They are very self-sufficient, with independent schools and community-supported welfare networks. Social contact with people outside the community is limited. The communities centre their lives on religious study, prayer and family. They do not rely on commercial television, secular films or publications. News and information are transmitted mainly by community specific print media. Frequent large social gatherings play a fundamental element of their community lifestyle. Rabbis or religious leaders enjoy utmost respect; their followers refer to them for guidance and advice on matters not necessarily related to religious practice or observance.
- Recommended vaccinations are generally accepted and the overall vaccination coverage for vaccine-preventable disease is satisfactory. Nevertheless, several small ultra-orthodox subgroups evade services provided by governmental agencies and health authorities. Thus, they would not register their children in public child well-baby clinics and not comply with the recommended childhood vaccinations. Consequently, these groups have been the focus of vaccine-preventable diseases outbreaks [37]. To avoid alienation and animosity, health organizations endeavouring to provide health services are adopting a more culturally sensitive approach.
